# Supplementary material for: A comprehensive review of covalent organic frameworks (COFs) and their derivatives in environmental pollution control
Source: Royal Society of Chemistry journal article supplement (doi:10.1039/d4cs00521j), 2024-01-01
Supplement: d4cs00521j1.pdf [file d4cs00521j1.pdf]

**Table S1**  
Abbreviation table

| Abbreviation     | Full name                                                         |
|------------------|-------------------------------------------------------------------|
| AI               | Artificial intelligence                                           |
| AO               | Auramine O                                                        |
| ASH              | 4-aminosalicylicylhydrazide                                       |
| BD               | Benzidine                                                         |
| BG               | Bright green                                                      |
| BPA              | Bisphenol A                                                       |
| BPAF             | Bisphenol AF                                                      |
| COFs             | Covalent organic frameworks                                       |
| CNTs             | Carbon nanotubes                                                  |
| CONs             | Covalent organic nanosheets                                       |
| CTFs             | Covalent triazine framework materials                             |
| CV               | Crystal violet                                                    |
| DAA              | 2,5-diaminobenzoic acid                                           |
| DB               | 2,5-dimethoxybenzaldehyde                                         |
| DBD              | Dielectric barrier discharge                                      |
| DCF              | Diclofenac sodium                                                 |
| DES              | Deep eutectic solvent                                             |
| DFT              | Density functional theory                                         |
| DMTP             | 2,5-Dimethoxybenzene-1,4-dicarboxaldehyde                         |
| DOS              | Density of states                                                 |
| EEF              | External electric field                                           |
| GCMC             | Grand canonical Monte Carlo                                       |
| GWP              | Global water partnership                                          |
| HCOFs            | Hollow COFs                                                       |
| HOF              | Hydrogen-bonded organic framework                                 |
| H <sub>2</sub> S | Hydrogen sulfide                                                  |
| LCA              | Life cycle assessment                                             |
| MA               | Melamine                                                          |
| MB               | Methylene blue                                                    |
| MCTP             | Microporous triazine polymer                                      |
| MG               | Malachite green                                                   |
| ML               | Machine learning                                                  |
| NCCT             | NiFe <sub>2</sub> O <sub>4</sub> -COF-chitosan-terephthalaldehyde |
| NFs              | Nanofiltration membranes                                          |
| NO <sub>x</sub>  | Nitrogen oxides                                                   |
| NSAID            | Nonsteroidal anti-inflammatory drug                               |
| PA-1             | P-phenylenediamine                                                |
| PA-COF           | Phenanthroline-based COF                                          |
| PBBS             | Polybrominated biphenyls                                          |
| PCBs             | Polychlorinated biphenyls                                         |
| PEM              | Proton exchange membranes                                         |
| PFAS             | Perfluorinated and polyfluorinated alkyl substances               |
| PPNs             | Porous polymer networks                                           |
| RB               | Rhodamine B                                                       |
| RT-iCOF          | Room temperature-induced COF                                      |
| SAMN             | Self-assembled molecular network                                  |
| SAs              | Sulfonamides                                                      |
| SDGs             | Sustainable development goals                                     |

---

|                 |                                        |
|-----------------|----------------------------------------|
| SO <sub>x</sub> | Sulfur oxides                          |
| SPME            | Solid phase microextraction            |
| TAPB            | 1,3,5-tris(4-aminophenyl)benzene       |
| Tab             | 1,3,5-tris(4-aminophenyl)benzene       |
| TAM             | Tetrakis(p-aminophenyl)methane         |
| TFP             | Triformylphloroglucinol                |
| TFPPy           | 1,3,6,8-Tetrakis(4-formylphenyl)pyrene |
| TM              | Transition metal elements              |
| Tp              | 1,3,5-triformylphloroglucinol          |
| Tz              | 1,3,5-tris(4-formyl-phenyl) triazine   |
| VOPs            | Volatile organic pollutants            |
| ZIB             | Zinc-ion batteries                     |

---
